# Supplementary material
Source: PubMed Central journal article supplement (PMC8009840)
Supplement: NIHMS1676179-supplement-1.pdf [file NIHMS1676179-supplement-1.pdf]

## Supporting Information

### **Verifying the Role of 3-Hydroxy of 17-Cyclopropylmethyl-4,5 $\alpha$ -epoxy-3,14 $\beta$ -dihydroxy-6 $\beta$ -[(4'-pyridyl) carboxamido]morphinan Derivatives via Their Binding Affinity and Selectivity Profiles on Opioid Receptors**

Boshi Huang,<sup>a</sup> Rama Gunta,<sup>a</sup> Huiqun Wang,<sup>a</sup> Mengchu Li,<sup>a</sup> Danni Cao,<sup>b,d</sup> Rolando E. Mendez,<sup>c</sup> James C. Gillespie,<sup>c</sup> Chongguang Chen,<sup>b</sup> Lan-Hsuan Melody Huang,<sup>b</sup> Lee-Yuan Liu-Chen,<sup>b</sup> Dana E. Selley,<sup>c</sup> Yan Zhang<sup>a,\*</sup>

<sup>a</sup> *Department of Medicinal Chemistry, School of Pharmacy, Virginia Commonwealth University, 800 E Leigh Street, Richmond, VA 23298, United States*

<sup>b</sup> *Center for Substance Abuse Research and Department of Pharmacology, Lewis Katz School of Medicine, Temple University, 3500 North Broad Street, MERB 851, Philadelphia, PA 19140, United States*

<sup>c</sup> *Department of Pharmacology and Toxicology, Virginia Commonwealth University, 410 North 12th Street, Richmond, Virginia 23298, United States*

<sup>d</sup> *Beijing Key Laboratory of Neuropsychopharmacology, State Key Laboratory of Toxicology and Medical Countermeasures, Beijing Institute of Pharmacology and Toxicology, Beijing, 100850, China*

---

\*Corresponding author. E-mail: yzhang2@vcu.edu. Phone: 1-804-8280021 (Y.Z.).

**Contents:**

1. Purity determination results by HPLC for target compounds **6a-e**

2. Molecular modeling study

*1. Purity determination results by HPLC for target compounds 6a-e*

*Compound 6a*

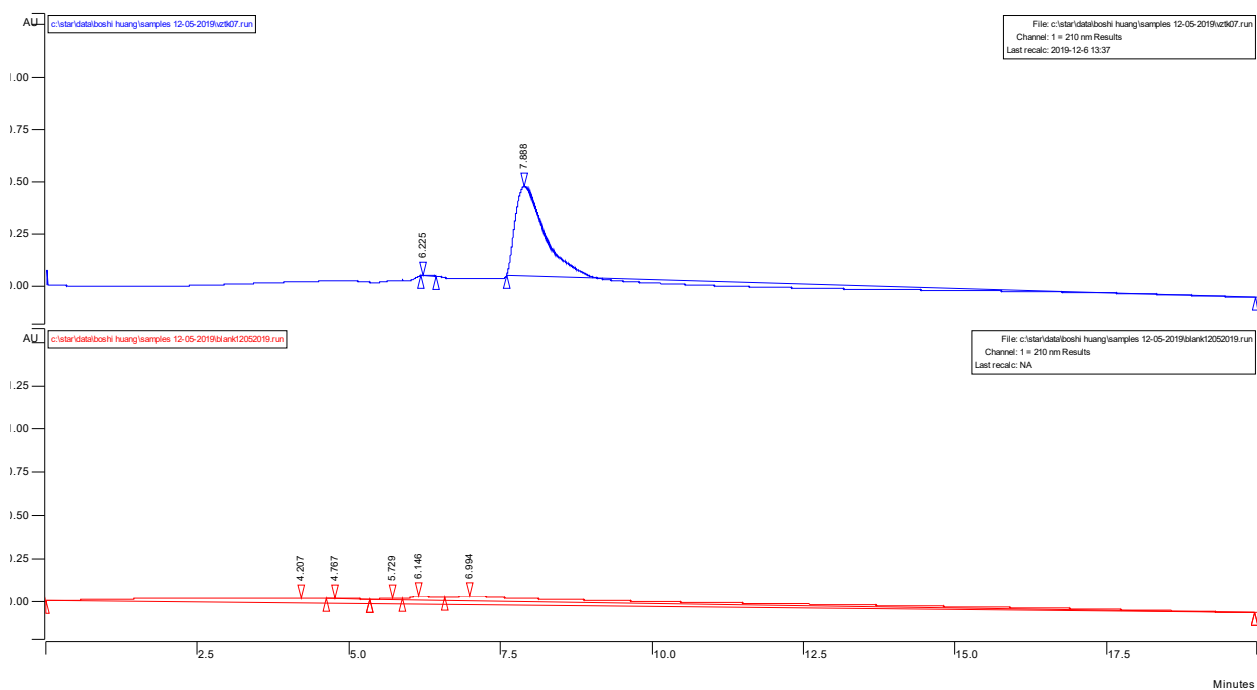

### Compound 6b

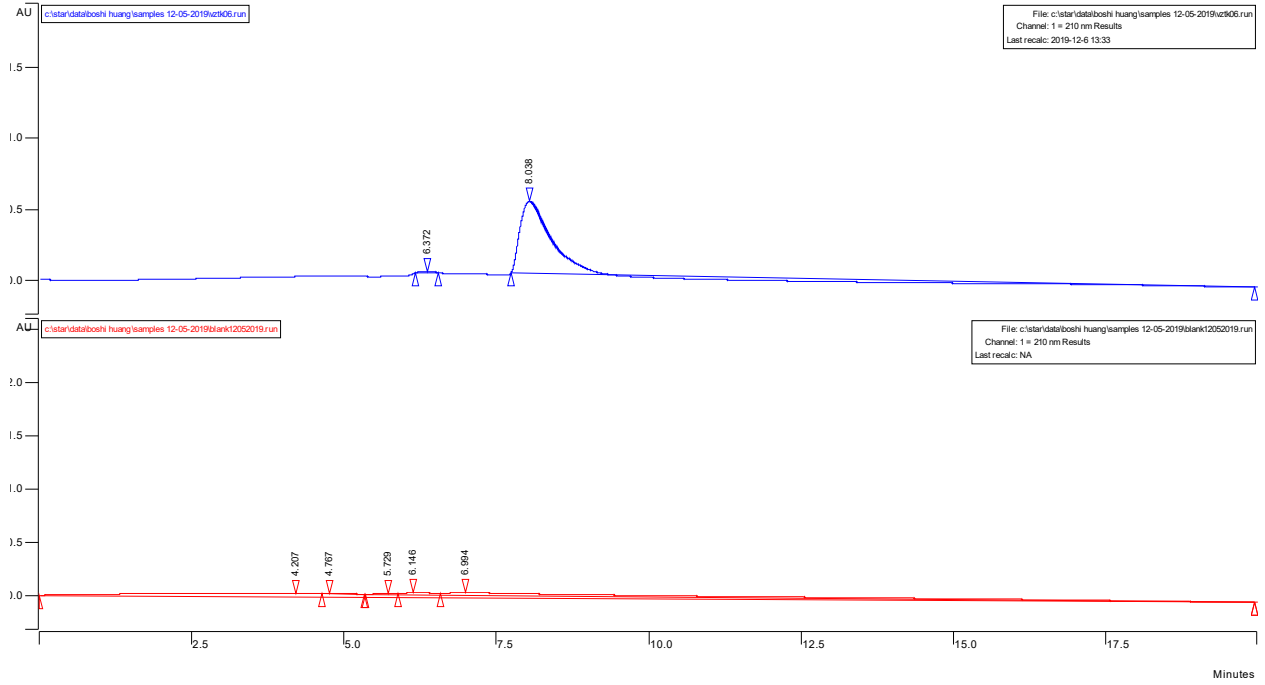

### Compound 6c

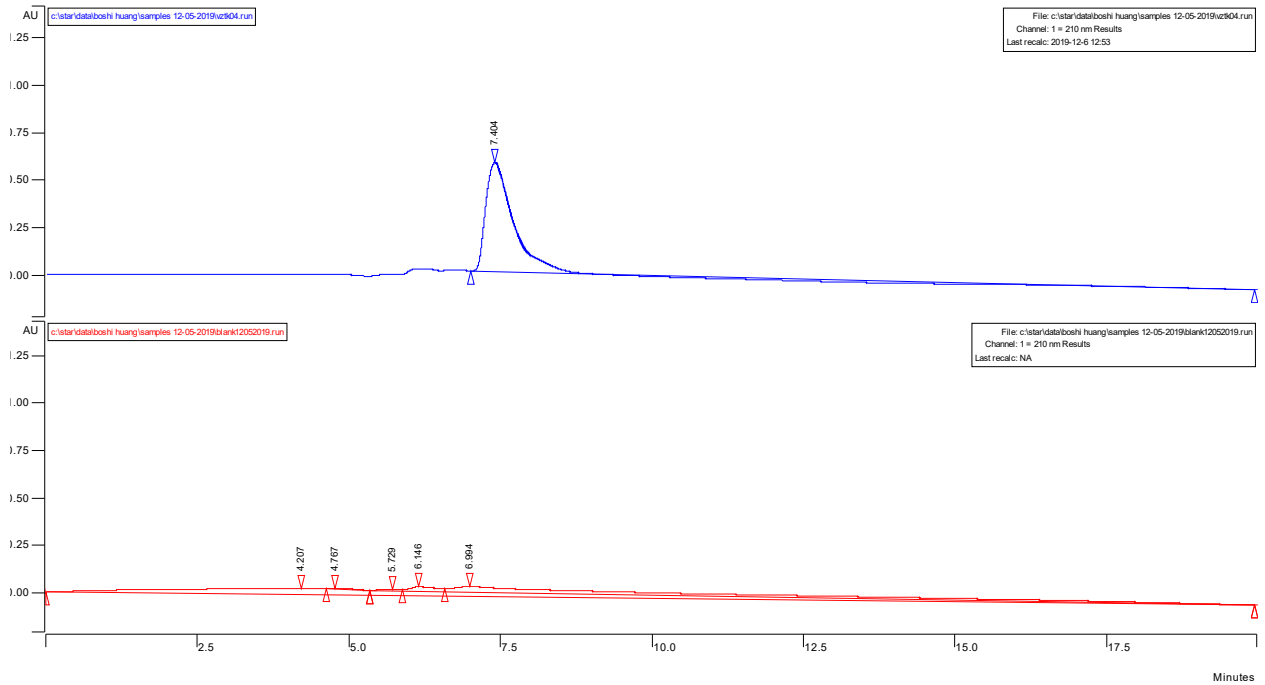

### Compound 6d

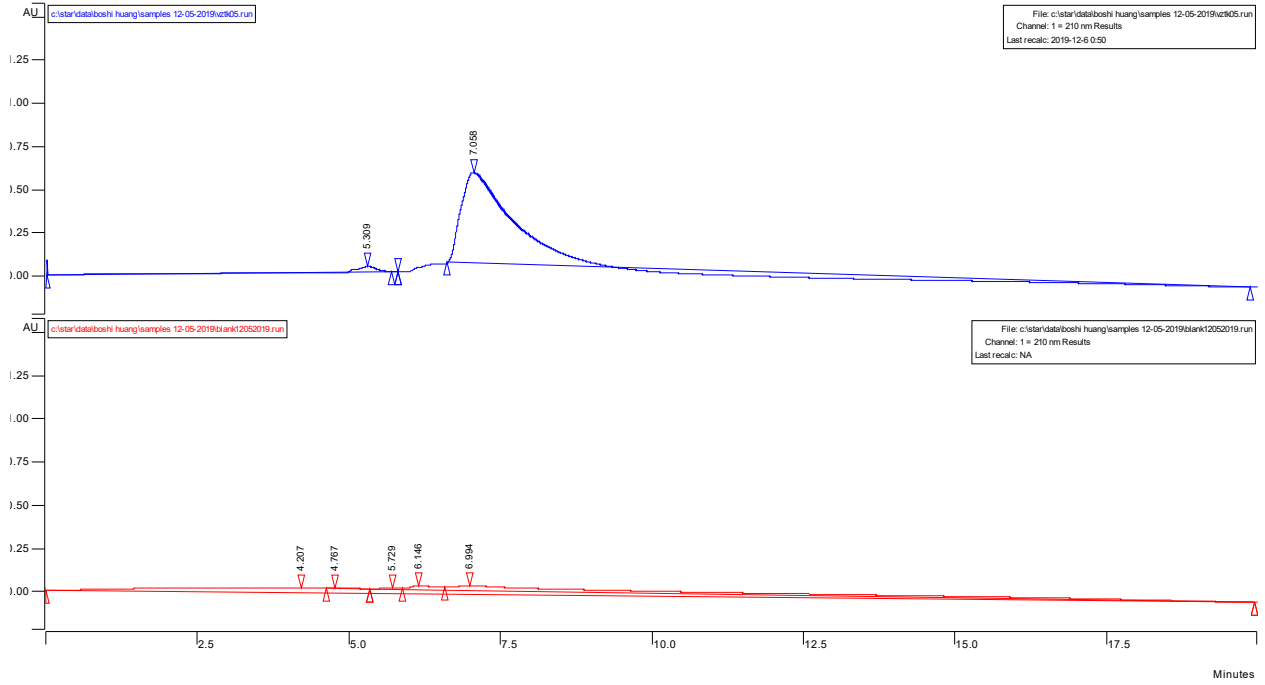

### Compound 6e

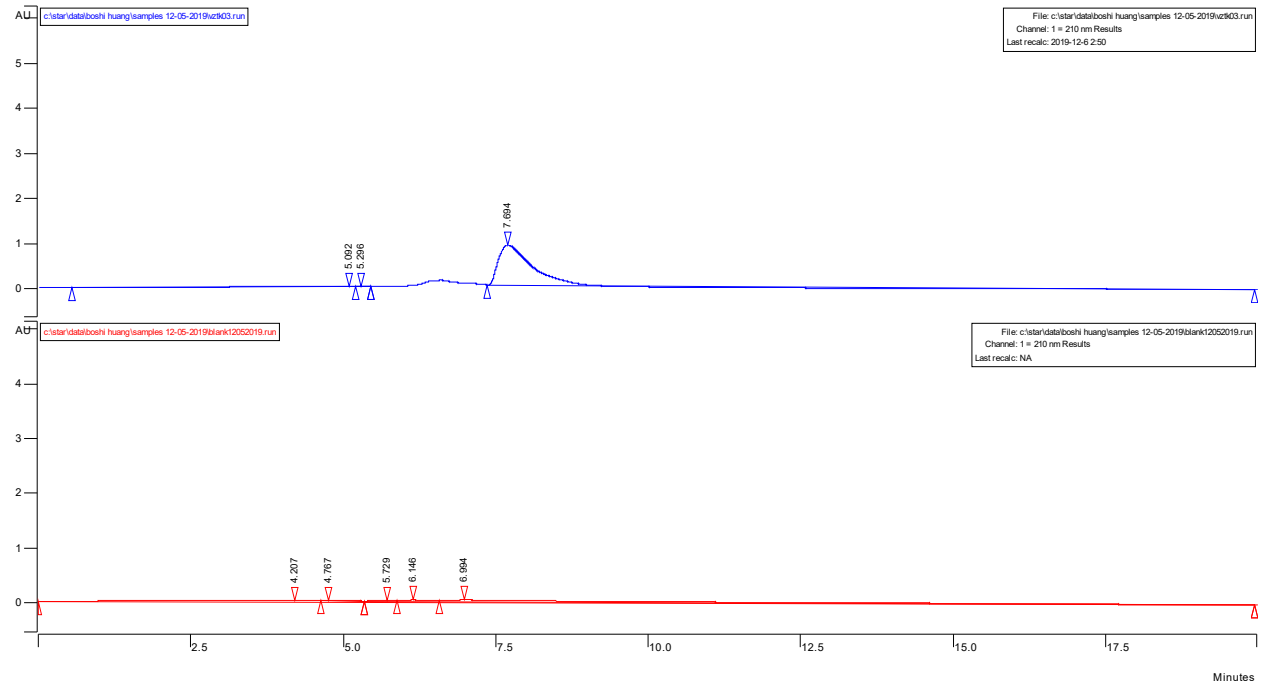

## 2. Molecular modeling study

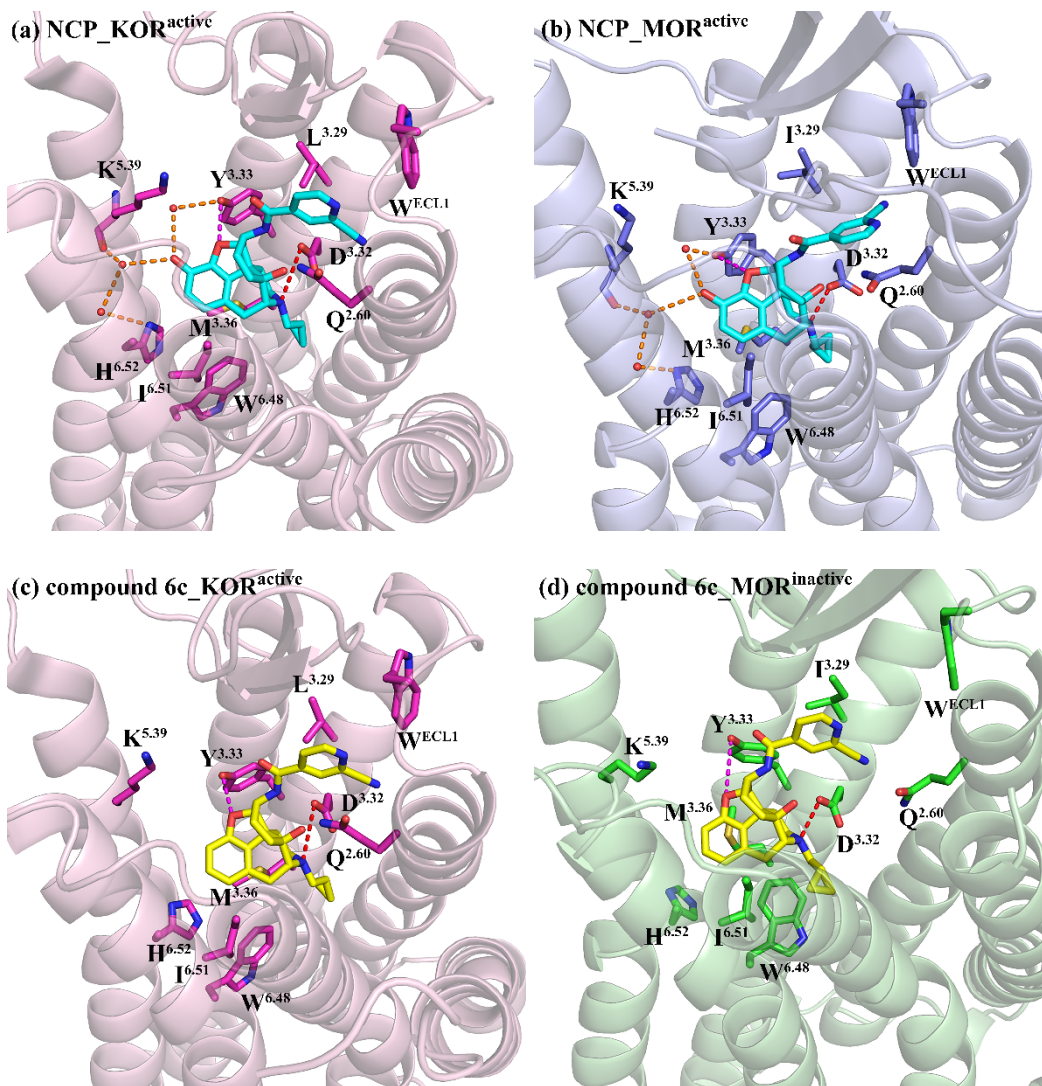

**Fig. S1.** The binding modes of NCP\_KOR<sup>active</sup>, NCP\_MOR<sup>active</sup>, compound 6c\_KOR<sup>active</sup>, and compound 6c\_MOR<sup>inactive</sup> complexes after molecular docking study. The receptors were shown as cartoon models, the active KOR in light-pink, the active MOR in light-blue, and the inactive MOR in light-green. NCP, compound 6c, and key amino acid residues were shown as stick models. Carbon atoms: NCP in cyan; compound 6c in yellow; key amino acid residues of the active KOR in magenta, the active MOR in blue, and the inactive MOR in green. The dashed lines in red represented potential ionic interactions. The dashed lines in magenta represented a potential hydrogen bonding interactions. The dashed lines in orange represented potential water-mediated hydrogen bonds. The water molecules were shown as sphere models in red.

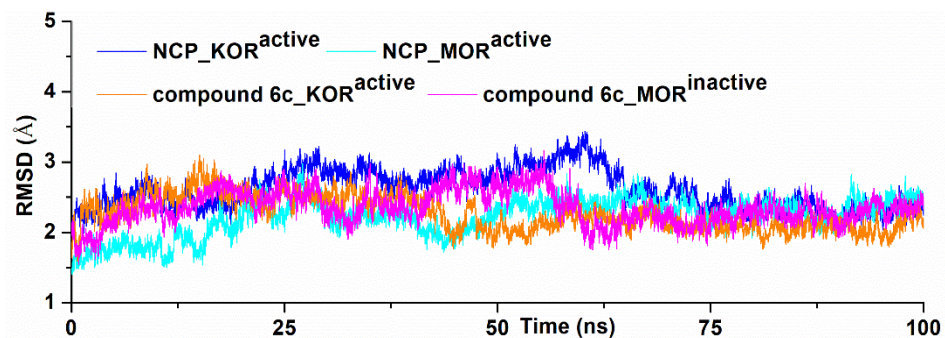

**Fig. S2.** The root-mean-square deviation (RMSD) of the backbone atoms of the residues in the NCP\_KOR<sup>active</sup>, NCP\_MOR<sup>active</sup>, compound 6c\_KOR<sup>active</sup>, and compound 6c\_MOR<sup>inactive</sup> complexes after 100 ns MD simulations.

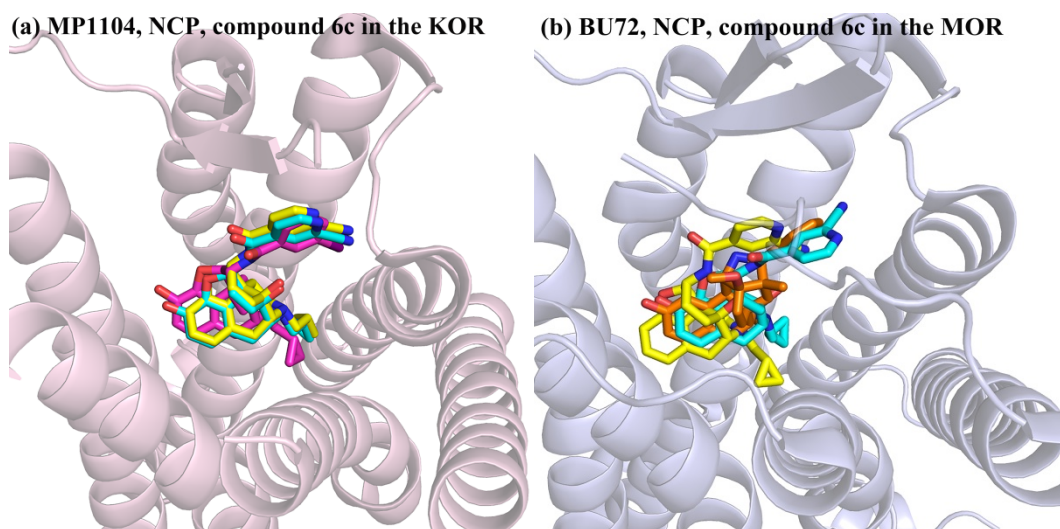

**Fig. S3.** The binding modes of MP1104, NCP, and compound 6c in the KOR (a) and BU72, NCP, and compound 6c in the MOR (b). The KOR and MOR shown as cartoon models in light-pink and light-blue, respectively. MP1104, NCP, compound 6c, and BU72 shown as stick models in magentas, cyan, yellow, and orange, respectively.

**Table S1.** The average distances between atoms of ligand and atoms of receptor in NCP\_KOR<sup>active</sup>, NCP\_MOR<sup>active</sup>, compound 6c\_KOR<sup>active</sup>, and compound 6c\_MOR<sup>inactive</sup> complexes during 80 - 100 ns MD simulations.

| Complex                   | Atom@Ligand | Atom@Receptor         | Distance (Å) |
|---------------------------|-------------|-----------------------|--------------|
| NCP_KOR <sup>active</sup> | N3@NCP      | OD2@D <sup>3.32</sup> | 2.7          |
|                           | O2@NCP      | OH@Y <sup>3.33</sup>  | 2.9          |
|                           | O4@NCP      | CB@K <sup>5.39</sup>  | 5.2          |

|                                             |                        |                       |            |
|---------------------------------------------|------------------------|-----------------------|------------|
|                                             | C12@NCP                | CZ3@W <sup>6.48</sup> | 4.2        |
|                                             | C11@NCP                | CG1@I <sup>6.51</sup> | 5.0        |
|                                             | C25@NCP                | CE1@H <sup>6.52</sup> | <b>3.5</b> |
|                                             |                        |                       |            |
| compound <b>6c</b> _KOR <sup>active</sup>   | N3@compound <b>6c</b>  | OD2@D <sup>3.32</sup> | 2.7        |
|                                             | O2@compound <b>6c</b>  | OH@Y <sup>3.33</sup>  | <b>3.3</b> |
|                                             | C26@compound <b>6c</b> | CB@K <sup>5.39</sup>  | <b>8.3</b> |
|                                             | C12@compound <b>6c</b> | CZ3@W <sup>6.48</sup> | 3.9        |
|                                             | C11@compound <b>6c</b> | CG1@I <sup>6.51</sup> | 4.9        |
|                                             | C25@compound <b>6c</b> | CE1@H <sup>6.52</sup> | <b>4.7</b> |
|                                             |                        |                       |            |
| NCP_MOR <sup>active</sup>                   | N3@NCP                 | OD2@D <sup>3.32</sup> | 2.6        |
|                                             | O2@NCP                 | OH@Y <sup>3.33</sup>  | <b>5.0</b> |
|                                             | O4@NCP                 | CB@K <sup>5.39</sup>  | <b>4.6</b> |
|                                             | C12@NCP                | CZ3@W <sup>6.48</sup> | 3.7        |
|                                             | C11@NCP                | CG1@I <sup>6.51</sup> | 5.0        |
|                                             | C25@NCP                | CE1@H <sup>6.52</sup> | <b>4.2</b> |
|                                             |                        |                       |            |
| compound <b>6c</b> _MOR <sup>inactive</sup> | N3@compound <b>6c</b>  | OD2@D <sup>3.32</sup> | 2.9        |
|                                             | O2@compound <b>6c</b>  | OH@Y <sup>3.33</sup>  | <b>5.5</b> |
|                                             | C26@compound <b>6c</b> | CB@K <sup>5.39</sup>  | <b>7.9</b> |
|                                             | C12@compound <b>6c</b> | CZ3@W <sup>6.48</sup> | 4.6        |
|                                             | C11@compound <b>6c</b> | CG1@I <sup>6.51</sup> | 4.7        |
|                                             | C25@compound <b>6c</b> | NE2@H <sup>6.52</sup> | <b>4.7</b> |
